# Supplementary material for: The representation of alkalinity and the carbonate pump from CMIP5 to CMIP6 ESMs and implications for the ocean carbon cycle
Source: Copernicus journal article supplement (doi:10.5194/egusphere-2022-1041), 2022-11-04
Supplement: Supplementary file [file egusphere-2022-1041-AC2-supplement.pdf]

# Reviews

We would like to thank the two reviewers of our manuscript for their thorough and careful review. We respond to their comments hereafter point by point and indicate what will be changed/updated in our revised manuscript.

## Referee #2 (Fortunat Joos)

I congratulate the authors on this very comprehensive, clear, and nicely written paper. The summary of the CMIP5 and CMIP6 model results for alkalinity and  $\text{CaCO}_3$  export fluxes and the underlying analysis are excellent and instructive. The figures are well done and informative. I enjoyed reading the paper. I appreciate the great scientific and technical efforts that have made this publication possible.

I recommend publications, pending considering the following main comments.

→ We thank Referee #2 for his comments and suggestions for improving our manuscript.

1) The authors neglect water mass circulation/transport and water age in their presentation, despite tracer transport by circulation, mixing, and convection being key model components. The view of the biological carbon pumps and their impact on the vertical gradients in DIC and Alk is limited to the export and dissolution fluxes. This is misleading and, in my opinion, incorrect. The transport of remineralized Alk and DIC and other tracers from the deep ocean to the surface is equally important for the establishment of the vertical DIC and Alk gradients, i.e., the biological pump. Thus a major component of the marine biological cycle is simply omitted in the presentation, analysis, and discussion. This shortcoming must be corrected during the revision

Biases in the tracer gradients could be caused by biases in export fluxes and remineralization of  $\text{CaCO}_3$  and OM, but equally caused by biases in surface-to-deep water mass exchange and water mass age. A too sluggish (meridional) model circulation and deep water ventilation will lead to too old (radiocarbon) ages and too high concentrations and too high surface-to-deep gradients in Alk, DIC, P, N, AOU in comparison to observations even when export and remineralization/dissolution would be perfectly represented by the model. Similarly, too-rapid surface-to-deep water exchange would tend to diminish surface-to-deep gradients.

1a) The neglect of circulation is evident, for example, in Fig. 1 “Schematic illustration of the processes affecting alkalinity ..and key steps of the carbonate pump”. The transport of high Alk waters from the depth to the surface is not shown in this figure. However, the surface ocean would become severely depleted in Alk and nutrients if there were no replacement of Alk from upward transport. Please add circulation/water transport to the scheme.

1b) I also do not trust the emergent constraint estimates for  $\text{CaCO}_3$  export for the same reason. For this estimate to be reliable, surface-to-deep water mass exchange/ventilation times need to be realistic. However, the authors do not discuss any biases in transport potentially affecting their estimate of  $\text{CaCO}_3$  export. For example, some models are known to have too old water mass ages and too high nutrients and AOU in the deep (e.g., Frischknecht et al., GBC, 2022). The given estimate on  $\text{CaCO}_3$  export may be misleading. It requires a quantification of the influence of potential biases in circulation.

→ The reviewer’s remark is highly relevant. In the revised manuscript, we will take into account the biases that the ocean circulation can contribute to.

1a) We have modified this scheme to add the circulation, but have also improved it in a more general way (see response to comment 7 below).

1b) We have assessed the potential impact of the ocean overturning circulation on our results considering AMOC and SMOc as output proxies of the global ocean circulation. We used the data provided by Heuzé et al. (2015) for the CMIP5 ensemble and Heuzé (2021) for CMIP6. Biases in ocean

circulation do not appear to be a significant driver of differences in export and alkalinity gradients across the CMIP ensembles. This will be discussed at length in the revised manuscript.

The inconsistent use of an age tracer ('age<sub>ss</sub>') across CMIP exercises limits its potential to clarify the impact of circulation on model biases in alkalinity (this will also be discussed in the revised manuscript). In our revision, we will also share a comparison between the Atlantic and Pacific oceans regarding the PIC export and sAlk vertical gradient, this provides some confidence in the relationship we share. However, the caveats the reviewer mentions will also be discussed. It was not our intention that this relationship be interpreted as a typical "emergent constraint"

**2)** Unit conversion errors related to the choice of density can lead to biases and such biases are potentially particularly large for the vertical gradients of Alk and DIC as shown in Fig. 11. The difference amounts to 32% of the vertical Alk gradient according to the authors (L661). The authors argue in section 4.2.2 that the in-situ and not the potential density of seawater should be used to convert gravimetric (mol/kg), as given by GLODAP, to volumetric (mol/m<sup>3</sup>) units, as used in most ESMs.

I remain confused regarding the recommendation to use in situ instead potential density for model-data comparison. Is the conversion between model (mol/m<sup>3</sup>) and observational units (mol/kg) not depending on whether the model is assuming incompressibility or not during tracer transport?

I also remain confused about whether GLODAP data and model data are compared correctly. The primitive equations are based on the assumption of incompressibility. Thus, tracer concentrations in mol/m<sup>3</sup> do not change under increasing pressure. ESMs are, at least in my understanding, using the assumption of incompressibility when transporting tracers within the ocean. It seems to me that for these models potential density is the right choice to convert GLODAP data in mol/kg to model data in mol/m<sup>3</sup> (whereas for models that do consider compressibility in-situ density would be the right choice.). Alternatively, model data could of course be converted using potential density to mol/kg. I have a suspicion that the authors converted GLODAP data to mol/m<sup>3</sup> units using in-situ density, while model units (mol/m<sup>3</sup>) relate actually to potential density. If correct, this would affect most quantitative estimates given in this MS.

I ask all authors to check the appropriateness of the applied unit conversion and the GLODAP- model data comparison.

→ We have greatly considered the reviewer's point here. On reflection and in discussion with physical ocean modelers, the assumption of incompressibility for most models means that GLODAP unit conversion for model comparison is best performed with the reference constant density used in the models (as opposed to in situ or potential density). We note that the difference between using a constant or potential density is minimal. In the revised manuscript, we have chosen to convert observations to model units using a reference density of 1,026 kg/m<sup>3</sup>. This value is consistent with what the majority of the model groups use to initialize alkalinity and DIC (see Supplementary Table S1). It is also a value close to the average surface density. This change in the conversion of observations has little impact on our surface analysis but partially modifies our results at depth as will be discussed in the revised manuscript.

### Further comments

**3)** The focus of the MS is on the surface and on global surface-to-deep gradients. This is very understandable given the high number of models analyzed. However, it is not so clear whether the improvement from CMIP5 to CMIP6 in dAlk also applies to individual basins and to the 3-d field. It would be nice if the authors would say a few words regarding 3-d fields.

(I realize that the MS contains already many elements, analyses, and figures and it is perfectly fine with me if the following suggestions on additional figures are ignored. Some ideas: perhaps complement Fig. 5 with similar figures showing profiles for different basins. It would be nice to see Fig D1 to be complemented with a figure showing the same quantities as plotted

for the surface along a section or zonally averaged (e.g., following Fig. D5). The Taylor diagram of Fig. 4 could be complemented with a diagram for the 3-d field).

→ During our analysis, we assessed multiple variables in 3D, in particular with profiles by basin and sections. Given the diversity of the representations, the analysis seemed too extensive for the manuscript. Nevertheless, we shared a set of additional figures via a zenodo link. We will put a reference to this link in the methods, in the "Background processing" section so that it is more accessible, as it was previously only cited at the end of the paper in the "Data availability" section: "We share additional figures (<https://doi.org/10.5281/zenodo.7144330>) to offer an ESM intercomparison (profiles, sections and maps) of the main three-dimensional variables processed in this study (Alk, sAlk, DIC, sDIC, NO<sub>3</sub>, PO<sub>4</sub>, CO<sub>3</sub>, T, S), both for CMIP5 and CMIP6, and in comparison with GLODAPv2 observations.". Given the changes that result from our response to comment 2), we will update/create a new zenodo link so that the observations in these additional figures are consistent with those in the revised manuscript.

4) I am wondering why the authors did not analyze CaCO<sub>3</sub>-derived Alk, TA\*, and compare TA\* model results with observation-based estimates of TA\*, given their focus on PIC. Is this for reasons how the project developed or for scientific reasons? I am not suggesting that the authors should repeat or expand their analysis, but perhaps they could provide either their arguments against using TA\* or say it if they want to encourage the use of TA\* in follow-up studies.

→ We had the possibility to use TA\*, dating from Feely et al. (2002) and reused by Koeve et al. (2014) for instance, as well as the method developed by Brewer et al. (1975) to which Sarmiento and Gruber (2006) added salinity normalization. The methods differ, in that one uses AOU (Apparent Oxygen Utilization) to distinguish alkalinity components (performed, remineralized and dissolved) and the other uses nitrate or phosphate to reconstruct potential alkalinity. Our choice of method here was influenced by Sarmiento and Gruber (2006), with little scientific justification (or downside). From a methodological point of view, it was also simpler as it would otherwise have been necessary to recalculate AOU for the models while we had the nitrate/phosphate fields directly available for the ESMs.

5) L90: As this MS deals also with the saturation horizon, it would be worthwhile to mention that the remineralization of POM has a dominating influence on CO<sub>3</sub><sup>2-</sup> in the thermocline, while CaCO<sub>3</sub> dissolution and POM remineralization tend to have offsetting effects on CO<sub>3</sub><sup>2-</sup> in the deep ocean.

CO<sub>3</sub><sup>2-</sup> is roughly ALK-DIC. Remineralization of 1 mol of C from POM increases DIC by 1 mol and lowers ALK by about 0.15 mol (using a C:ALK ratio of 17:117) and ALK-DIC decreases by 1.15 mol. In contrast, the dissolution of 1 mol C from CaCO<sub>3</sub> increases ALK-DIC (and thus CO<sub>3</sub><sup>2-</sup>) by 1 mol. As the flux from POM/DOM remineralization is much larger than the CaCO<sub>3</sub> dissolution flux in the thermocline, it has a dominating impact on CO<sub>3</sub><sup>2-</sup> in the thermocline. The effect of POM dissolution on CO<sub>3</sub><sup>2-</sup> can also not be neglected in the deep.

→ We agree with the reviewer, but think that this should not be part of the introduction, but rather the discussion where we assess the carbonate ion concentration and the saturation state. We will ensure that in the revised version of the paper we include elements regarding this in the discussion.

6) L97: burial of POM and CaCO<sub>3</sub>, balancing weathering input in the long run, should also be mentioned here.

→ We retrieved information regarding the global alkalinity budget for the different modeling groups (see Fig. C1). However, we are forced to discuss this possible balance between weathering input and PIC-POC burial rather than affirm it, as there are model discrepancies (see the last paragraph of Sect. 4.3.2 and the Supplementary Table S1).

7) Fig. 1: The scheme of Fig. 1 is misleading. Please show an arrow for circulation/physical transport. This is important. Upwelling indeed affects Alk at the surface and the displayed model- data differences in Alk could be due to biases in circulation and water mass age.

Fig. 1: The labeling "PIC export" is not very accurate. Suggest modifying to "PIC fluxes"  
Fig. 1: Perhaps, show POM fluxes using a thin line or at least briefly mention their role for Alk in the caption.

→ Thank you for these comments. We have modified the scheme in order to be more consistent regarding the processes affecting alkalinity. We have added arrows for the circulation as well as the N-reactions. We have also modified the carbonate pump part and added the soft tissue pump in parallel to make both of them comparable.

8) L230: Battaglia et al used a probabilistic approach, while Sulpis et al used chemistry and age. Why not show both estimates in Fig. 1 and the corresponding SI figures?  
L235: Why focus on a single estimate for POC export and not on the range (e.g. given in Sarmiento and Gruber) or the estimate from Schlitzer, 2002,2004), Yao and Schlitzer, GMD, 2013.

→ Thank you for pointing out this confusion between Sulpis et al. (2021) and Battaglia et al. (2016), it has been changed accordingly.

We chose to consider only the latest export estimates for clarity and to have reference values for both PIC and POC export given the wide range of estimates in both cases. Indeed, the uncertainties in these exports are large as discussed in Sulpis et al. (2021) with respect to PIC, and in Schlitzer et al. (2013) with respect to POC. We have clarified the choice to use only the latest estimates in the method section, and we have added an overview of the estimated ranges for both PIC and POC exports (Sulpis et al., 2021; Schlitzer et al., 2013).

9) L268: (i) the soft tissue pump has no impact on Alk in BFM4 and MEDUSA-2.0; Perhaps these two models and CMCC-CMIP5 should be excluded from assessments of the saturation horizon?

→ It is true that this will have an influence on the calculation of both CMIP5 and CMIP6 ensemble means, or on their distributions. Nevertheless, we have decided in this study not to make a case-by-case approach which would necessitate a number of specificities to be mentioned as soon as the CMIP5/6 ensembles are considered from a statistical point of view.

10) L402: I am confused here. Has the inter-ESM sdv not increased from CMIP5 to CMIP6?

11) Fig. 6: I am a bit confused here regarding panels in b). The color bar is greyscaled, but in the chart, there are also colors such as green, orange, red, and blue. I guess darker color means higher values, but these are hard to associate with the grey scale. Maybe give the actual numbers above the bars? I guess the different bars correspond to different latitudinal bands, but how are these delineated? Maybe the colors relate to Fig. A1?

→ Exactly, the colors are referenced in Fig. A1, and enable us to distinguish the different basins. A few elements have been added to the legend in order to make things clearer and point towards fig. A1 as well to understand how the basins were delineated.

12) L485: Strictly speaking, you do not show that the effect of POM and salinity on the sAlk gradient is negligible as the results are given for the bias.

→ This has been corrected.

13) L487: Circulation and water mass age are missing. The increase at depth could also be related to an increase in water mass age allowing more time for Alk to accumulate. This should be mentioned. I would find the emergent constraint for PIC export more convincing when it would be demonstrated that the models do indeed capture the water mass age somewhat realistically, e.g. by analyzing radiocarbon. Is the relationship robust shown in Fig. 8a robust? Do you get the same global export when analyzing different basins separately? Do you get the same number when analyzing different depth levels? Do you also account for a plausible uncertainty in the observational estimate; this would broaden the inferred range.

→ The reviewer makes an interesting point regarding water mass age. The elements that we are about to implement to address this issue were stated in our response to comment 1).

This relationship between the PIC export and the sAlk vertical gradient evolves slightly depending on the basin considered with an  $R^2$  fluctuating between 0.43 for the Pacific and 0.64 for the Indian Ocean. In the reviewer responses we will share figures at basin scale, but we won't include them in the revised manuscript, given they require a complex and case-by-case analysis.

14) Section 4.2.2 I found this subsection a bit on the long side with the potential for shortening. I also missed a clear separation between spin-up and evaluation and suggest separating the discussion with respect to these two topics.

Spin up: In principle, it should not matter for the final steady state how the spatial gradient in ALK is initialized as long as the model is indeed run to a steady state. Thus, I have a hard time believing that the unit conversion affects the final steady state field. I would rather associate biases with an insufficient spin-up length and model deficiencies. Of course, if the model is initialized with the observed field and the spin-up period is kept short, the model-data agreement may be high, but potentially for the wrong reason.

→ We agree with the reviewer, particularly given comment 2) and our intended changes to observational unit conversion. This section will therefore be shortened and rewritten. In addition, we will add a section in the discussion entitled "Model data comparison" to discuss the potential biases in analyses combining observations and models.
